# Supplementary material
Source: PubMed Central journal article supplement (PMC10334259)
Supplement: NIHMS1907030-supplement-Supplemental_Material.pdf [file NIHMS1907030-supplement-Supplemental_Material.pdf]

## Table of Contents

### Supplementary Figures

|                                                                                        |   |
|----------------------------------------------------------------------------------------|---|
| Figure S1: Example of the gating strategy used for platelet flow cytometry experiments | 2 |
|----------------------------------------------------------------------------------------|---|

### Supplementary Tables

|                                                                                                                                        |    |
|----------------------------------------------------------------------------------------------------------------------------------------|----|
| Table S1: Clinical characteristics of the discovery cohort                                                                             | 3  |
| Table S2: Clinical characteristics of the US validation cohort                                                                         | 4  |
| Table S3: Clinical characteristics of the European validation cohort                                                                   | 5  |
| Table S4: Hazard ratios for 3-year MACE for the covariates used in the adjusted Cox models in the discovery cohort                     | 6  |
| Table S5: Hazard ratios for 3-year MACE for the covariates used in the adjusted Cox models in the US validation cohort                 | 7  |
| Table S6: Hazard ratios for 3-year MACE for the covariates used in the adjusted Cox models in the European validation cohort           | 8  |
| Table S7: Gender-stratified Cox models for 3-year MACE for erythritol quartiles in the discovery cohort                                | 9  |
| Table S8: Gender-stratified Cox models for 3-year MACE for erythritol quartiles in the US validation cohort                            | 10 |
| Table S9: Gender-stratified Cox models for 3-year MACE for erythritol quartiles in the European validation cohort                      | 11 |
| Table S10: Hazard ratios for 3-year MACE for erythritol quartiles (Q4 vs. Q1) in different subgroups of the US validation cohort       | 12 |
| Table S11: Hazard ratios for 3-year MACE for erythritol quartiles (Q4 vs. Q1) in different subgroups of the European validation cohort | 13 |
| Table S12. Cox regression models in the discovery cohort                                                                               | 14 |
| Table S13. Cox regression analysis in US validation cohort                                                                             | 15 |
| Table S14. Cox regression analysis in the European validation cohort                                                                   | 16 |

Supplementary figures:

BD FACSDiva 9.0

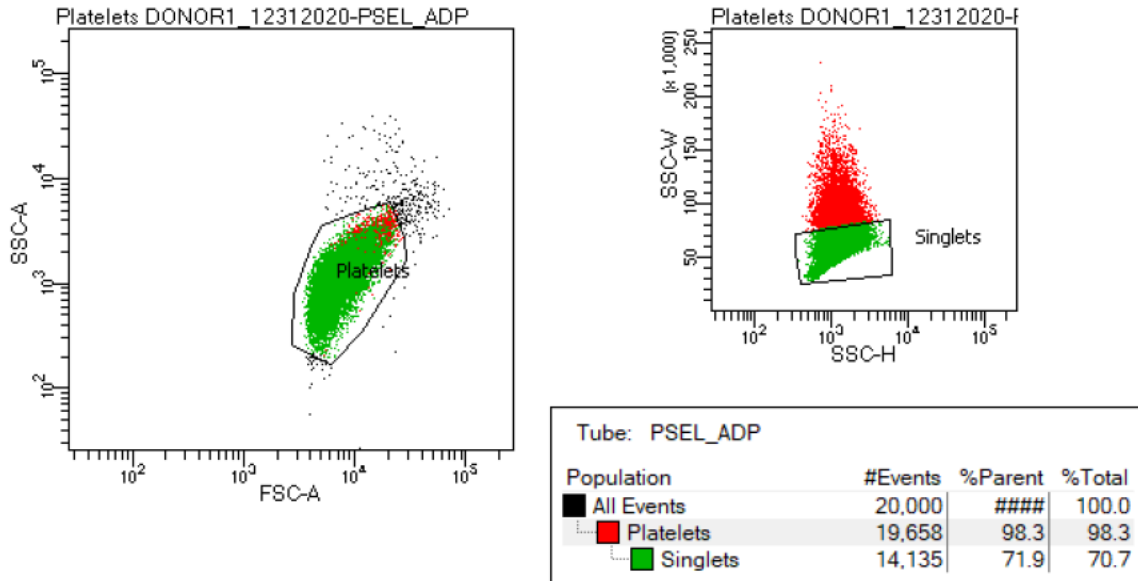

**Figure S1: Example of the gating strategy used for platelet flow cytometry**

**experiments.** Human washed platelets were exposed to vehicle (saline), stimulated with 2  $\mu$ M ADP and incubated with anti-P-selectin antibody (CD62P-PE). The sample was analyzed on a FACS LSR Fortessa flow cytometer. Platelets were gated to exclude doublets and the raw mean fluorescent intensity (MFI) was quantified. Twenty thousand events were collected.

## Supplementary tables:

**Table S1: Clinic characteristics of the discovery cohort**

| Characteristics           | Quartile 1<br>(n=290) | Quartile 2<br>(n=289) | Quartile 3<br>(n=289) | Quartile 4<br>(n=289) | p      |
|---------------------------|-----------------------|-----------------------|-----------------------|-----------------------|--------|
| Age (yr)                  | 59.8(51.9-69)         | 61.3(54.1-70.5)       | 66.5(57.4-72.5)       | 70.2(61.8-76)         | <0.001 |
| Male (%)                  | 69.3                  | 68.5                  | 62.3                  | 54.3                  | <0.001 |
| BMI (kg/m <sup>2</sup> )  | 27.8(24.9-31.6)       | 28.4(25.2-31.2)       | 28.7(25.6-31.9)       | 28.7(25.9-33.6)       | 0.04   |
| Diabetes mellitus (%)     | 14.8                  | 13.1                  | 23.5                  | 36.7                  | <0.001 |
| Hypertension (%)          | 59.7                  | 61.9                  | 67.1                  | 65.4                  | 0.24   |
| Current smoking (%)       | 15.9                  | 17.3                  | 12.1                  | 9.4                   | 0.02   |
| CAD (%)                   | 75.9                  | 78.2                  | 70.6                  | 77.5                  | 0.14   |
| Heart failure (%)         | 22.1                  | 21.0                  | 24.3                  | 33.3                  | 0.02   |
| History of MI (%)         | 45.5                  | 44.7                  | 45.1                  | 50.0                  | 0.57   |
| LDL-c (mg/dl)             | 100(82-118)           | 96(80-117)            | 97(83-112)            | 93(76-114)            | 0.05   |
| HDL-c (mg/dl)             | 34(29-42)             | 34(28-40)             | 34(28-41)             | 33.9(27-40)           | 0.22   |
| Total cholesterol (mg/dl) | 163(145-187)          | 160(141-188)          | 164(143-185)          | 161(139-188)          | 0.86   |
| Triglycerides (mg/dl)     | 110(75-153)           | 119(82-170)           | 123(85-161)           | 136(96-201)           | <0.001 |

The baseline characteristics of participants in the discovery cohort are shown stratified by erythritol quartiles. Continuous data are presented as median (interquartile range). Categorical variables are presented as %. BMI, body mass index; CAD, coronary artery disease; HDL, high density lipoprotein; LDL, low density lipoprotein; MI, myocardial infarction. Two-sided P values were calculated by Kruskal-Wallis test for numerical data and Chi-Square test for categorical data comparing erythritol quartiles. n=1,157.

**Table S2: Clinical characteristics of the US validation cohort**

| Characteristics           | Quartile 1<br>(n=542) | Quartile 2<br>(n=534) | Quartile 3<br>(n=540) | Quartile 4<br>(n=533) | p      |
|---------------------------|-----------------------|-----------------------|-----------------------|-----------------------|--------|
| Age (yr)                  | 57.5(51-64)           | 60.5(54-67)           | 64.8(57-72)           | 70(60-76)             | <0.001 |
| Male (%)                  | 66.6                  | 65.9                  | 65.0                  | 58.5                  | 0.02   |
| BMI (kg/m <sup>2</sup> )  | 28.5(25.1-31.9)       | 28.3(25.6-31.6)       | 28.7(25.9-32.5)       | 28.1(25.3-32.9)       | 0.30   |
| Diabetes mellitus (%)     | 12.4                  | 15.7                  | 23.9                  | 36.6                  | <0.001 |
| Hypertension (%)          | 61.4                  | 62.7                  | 64.3                  | 64                    | 0.76   |
| Current smoking (%)       | 16.4                  | 14.5                  | 8.6                   | 11.4                  | 0.001  |
| CAD (%)                   | 66.7                  | 71.1                  | 77.4                  | 85.0                  | <0.001 |
| Heart failure (%)         | 16.1                  | 21.2                  | 26.7                  | 37.9                  | <0.001 |
| History of MI (%)         | 30.9                  | 35.9                  | 41.2                  | 50.1                  | <0.001 |
| LDL-c (mg/dl)             | 99(80-120)            | 99.5(79-120)          | 94(76-116)            | 93(73-111)            | <0.001 |
| HDL-c (mg/dl)             | 35(29-43)             | 35(29-42)             | 34(28-41)             | 32(26-38)             | <0.001 |
| Total cholesterol (mg/dl) | 162(140-187)          | 163(143-191)          | 160(137-186)          | 158(132-184)          | 0.005  |
| Triglycerides (mg/dl)     | 103(77-139)           | 111(82-161)           | 119(87-159)           | 131(93-188)           | <0.001 |

The baseline characteristics of participants in the US validation cohort are shown stratified by erythritol quartiles. Continuous data are presented as median (interquartile range). Categorical variables are presented as %. BMI, body mass index; CAD, coronary artery disease; HDL, high density lipoprotein; LDL, low density lipoprotein; MI, myocardial infarction. Two-sided P values were calculated by Kruskal-Wallis test for numerical data and Chi-Square test for categorical data comparing erythritol quartiles. n=2,149.

**Table S3: Clinical characteristics of the European validation cohort**

| Characteristics           | Quartile 1<br>(n=209) | Quartile 2<br>(n=211) | Quartile 3<br>(n=205) | Quartile 4<br>(n=208) | p      |
|---------------------------|-----------------------|-----------------------|-----------------------|-----------------------|--------|
| Age-yr                    | 67(59-76)             | 72(65-79)             | 77(69-82)             | 79(73-85)             | <0.001 |
| Male (%)                  | 71.8                  | 73.5                  | 64.9                  | 70.2                  | 0.25   |
| Diabetes mellitus (%)     | 13.4                  | 19.4                  | 32.2                  | 46.6                  | <0.001 |
| Hypertension (%)          | 75.6                  | 79.6                  | 82.4                  | 84.1                  | 0.14   |
| Current smoking (%)       | 29.7                  | 14.7                  | 10.2                  | 12.5                  | <0.001 |
| CAD (%)                   | 64.6                  | 65.4                  | 68.3                  | 78.8                  | 0.005  |
| Heart failure (%)         | 54.3                  | 60.7                  | 68.8                  | 83.6                  | <0.001 |
| History of MI (%)         | 44.0                  | 46.4                  | 46.6                  | 61.5                  | 0.001  |
| LDL-c (mg/dl)             | 98(71-131)            | 96(71-130)            | 91(72-121)            | 82(64-105)            | <0.001 |
| HDL-c (mg/dl)             | 49(40-62)             | 49(39-60)             | 48(40-62)             | 45(36-57)             | 0.06   |
| Total cholesterol (mg/dl) | 162(137-197)          | 165(136-199)          | 167(136-198)          | 156(129-180)          | 0.05   |
| Triglycerides (mg/dl)     | 121(89-172)           | 111(87-163)           | 115(90-160)           | 133(95-174)           | 0.19   |

The baseline characteristics of participants in the European validation cohort are shown stratified by erythritol quartiles. Continuous data are presented as median (interquartile range). Categorical variables are presented as %. BMI, body mass index; CAD, coronary artery disease; HDL, high density lipoprotein; LDL, low density lipoprotein; MI, myocardial infarction. Two-sided P values were calculated by Kruskal-Wallis test for numerical data and Chi-Square test for categorical data comparing erythritol quartiles. n=833.

**Table S4: Hazard ratios for 3-year MACE for the covariates used in the adjusted Cox models in the discovery cohort**

|                 | HR with 95% CI     | P value |
|-----------------|--------------------|---------|
| Age             | 1.06 (0.85 - 1.34) | 0.59    |
| Gender          | 1.10 (0.70 - 1.72) | 0.69    |
| Blood pressure  | 1.05 (0.88 - 1.26) | 0.59    |
| Diabetes        | 1.23 (0.79 - 1.91) | 0.36    |
| Smoking         | 1.28 (0.73 - 2.25) | 0.39    |
| LDL cholesterol | 1.02 (0.83 - 1.26) | 0.83    |
| HDL cholesterol | 1.03 (0.80 - 1.31) | 0.84    |
| Triglycerides   | 1.09 (0.96 - 1.23) | 0.18    |
| BMI             | 0.90 (0.72 - 1.13) | 0.36    |

BMI, body mass index; LDL, low-density lipoprotein; HDL, high-density lipoprotein. Two-sided P values for the adjusted Cox model are indicated. n=1,157.

**Table S5: Hazard ratios for 3-year MACE for the covariates used in the adjusted Cox models in the US validation cohort**

|                 | HR with 95% CI     | P value |
|-----------------|--------------------|---------|
| Age             | 1.60 (1.35 - 1.89) | <0.001  |
| Gender          | 0.77 (0.57 - 1.05) | 0.10    |
| Blood pressure  | 1.01 (0.87 - 1.19) | 0.86    |
| Diabetes        | 0.83 (0.59 - 1.17) | 0.29    |
| Smoking         | 2.02 (1.39 - 2.92) | <0.001  |
| LDL cholesterol | 1.01 (0.86 - 1.17) | 0.95    |
| HDL cholesterol | 0.81 (0.69 - 0.96) | 0.02    |
| Triglycerides   | 0.88 (0.73 - 1.06) | 0.17    |
| BMI             | 0.94 (0.81 - 1.11) | 0.48    |

BMI, body mass index; LDL, low-density lipoprotein; HDL, high-density lipoprotein. Two-sided P values for the adjusted Cox model are indicated. n=2,149.

**Table S6: Hazard ratios for 3-year MACE for the covariates used in the adjusted Cox models in the European validation cohort**

|                 | HR with 95% CI     | P value |
|-----------------|--------------------|---------|
| Age             | 1.78 (1.40 - 2.28) | <0.001  |
| Gender          | 1.06 (0.70 - 1.61) | 0.77    |
| Hypertension    | 1.25 (0.74 - 2.11) | 0.40    |
| Diabetes        | 1.53 (1.04 - 2.24) | 0.03    |
| Smoking         | 1.66 (1.00- 2.74)  | 0.05    |
| LDL cholesterol | 1.12 (0.89 - 1.42) | 0.32    |
| HDL cholesterol | 0.94 (0.73 - 1.22) | 0.66    |
| Triglycerides   | 1.06 (0.87 - 1.29) | 0.54    |

LDL, low-density lipoprotein; HDL, high-density lipoprotein. Two-sided P values for the adjusted Cox model are indicated. n=833.



**Table S7: Gender-stratified Cox models for 3-year MACE in the discovery cohort**

| Female (n=421) | Quartile 1 (n=106) | Q2 (n=105)         | Q3 (n=105)         | Q4 (n=105)            |
|----------------|--------------------|--------------------|--------------------|-----------------------|
| Unadjusted HR  | 1                  | 2.35 (0.83 - 6.65) | 1.35 (0.43 - 4.25) | 4.46 (1.68 - 11.86)** |
| Adjusted HR    | 1                  | 2.46 (0.84 - 7.19) | 1.46 (0.41 - 5.11) | 5.00 (1.68 - 14.9)**  |

  

| Male (n=736)  | Q1 (n=185) | Q2 (n=184)         | Q3 (n=183)         | Q4 (n=184)            |
|---------------|------------|--------------------|--------------------|-----------------------|
| Unadjusted HR | 1          | 1.19 (0.55 - 2.57) | 0.64 (0.26 - 1.56) | 3.25 (1.69 - 6.24)*** |
| Adjusted HR   | 1          | 1.17 (0.53 - 2.58) | 0.59 (0.24 - 1.46) | 2.69 (1.34 - 5.41)**  |

The adjustment included age, sex, diabetes mellitus, blood pressure, low-density and high-density lipoprotein cholesterol levels, triglyceride levels, current smoking status and BMI.

Two-sided P values for the Cox model are indicated as follows \*\*\*P<0.001, \*\*P<0.01. n=1,157.

**Table S8: Gender-stratified Cox models for 3-year MACE in the US validation cohort**

| Female (n=773) | Q1 (n=194) | Q2 (n=194)         | Q3 (n=195)         | Q4 (n=190)            |
|----------------|------------|--------------------|--------------------|-----------------------|
| Unadjusted HR  | 1          | 1.11 (0.56 - 2.22) | 1.41 (0.73 - 2.74) | 2.30 (1.25 - 4.23)**  |
| Adjusted HR    | 1          | 1.02 (0.52 - 2)    | 1.18 (0.61 - 2.31) | 1.59 (0.79 - 3.2)     |
| Male (n=1376)  | Q1 (n=344) | Q2 (n=348)         | Q3 (n=340)         | Q4 (n=344)            |
| Unadjusted HR  | 1          | 1.08 (0.59 - 1.99) | 1.7 (0.98 - 2.94)  | 2.82 (1.70 - 4.70)*** |
| Adjusted HR    | 1          | 1.02 (0.55 - 1.90) | 1.38 (0.79 - 2.43) | 1.96(1.13 - 3.39)*    |

The adjustment included age, sex, diabetes mellitus, blood pressure, low-density and high-density lipoprotein cholesterol levels, triglyceride levels, current smoking status and BMI.

Two-sided P values for the Cox model are indicated as follows \*\*\*P<0.001, \*\*P<0.01, \*P<0.05.

n=2,149.

**Table S9: Gender-stratified Cox models for 3-year MACE in the European validation cohort**

| Female (n=249) | Q1 (n=63)  | Q2 (n=62)          | Q3 (n=62)          | Q4 (n=62)             |
|----------------|------------|--------------------|--------------------|-----------------------|
| Unadjusted HR  | 1          | 1.64 (0.64 - 4.2)  | 1.67 (0.65 - 4.30) | 3.77 (1.61 - 8.80)**  |
| Adjusted HR    | 1          | 1.82 (0.48 - 7.0)  | 1.66 (0.53 - 5.19) | 2.27 (0.75 - 6.82)    |
| Male (n=584)   | Q1 (n=150) | Q2 (n=142)         | Q3 (n=146)         | Q4 (n=146)            |
| Unadjusted HR  | 1          | 1.22 (0.65 - 2.32) | 2.09(1.17 - 3.72)* | 4.92 (2.89 - 8.35)*** |
| Adjusted HR    | 1          | 0.98 (0.46 - 2.09) | 0.93 (0.43 - 1.98) | 2.37(1.16 - 4.84)*    |

The adjustment included age, sex, diabetes mellitus, hypertension, low-density and high-density lipoprotein cholesterol levels, triglyceride level and current smoking status. Two-sided P values for the Cox model are indicated as follows \*\*\*P<0.001, \*\*P<0.01, \*P<0.05. n=833.

**Table S10: Hazard ratios for 3-year MACE for erythritol in different subgroups of the US validation cohort**

| Subgroup                           | n    | Q4 vs. Q1 HR (95% CI) | P value | P for interaction |
|------------------------------------|------|-----------------------|---------|-------------------|
| Age ≥ 70                           | 608  | 2.06 (1.22 - 3.49)    | 0.007   | 0.61              |
| Age < 70                           | 1541 | 1.86 (1.12 - 3.08)    | 0.02    |                   |
| Female                             | 773  | 2.30 (1.25 - 4.23)    | 0.007   | 0.43              |
| Male                               | 1356 | 2.82 (1.70 - 4.70)    | <0.001  |                   |
| Hypertension                       | 652  | 3.12 (1.25 - 7.76)    | 0.01    | 0.95              |
| No Hypertension                    | 1489 | 2.69 (1.71 - 4.24)    | <0.001  |                   |
| Diabetes                           | 475  | 2.07 (0.93 - 4.57)    | 0.07    | 0.55              |
| No Diabetes                        | 1674 | 2.63 (1.69 - 4.09)    | <0.001  |                   |
| HbA1C≥5.7 %                        | 1081 | 2.48 (1.45 - 4.24)    | 0.001   | 0.20              |
| HbA1C<5.7 %                        | 952  | 3.04 (1.62 - 5.68)    | 0.001   |                   |
| GFR ≥ 60 ml/min/1.73m <sup>3</sup> | 1834 | 1.83 (1.18 - 2.85)    | 0.007   | 0.11              |
| GFR <60 ml/min/1.73m <sup>3</sup>  | 315  | 4.47 (1.82 – 11.0)    | 0.001   |                   |
| BMI ≥27 kg/m <sup>2</sup>          | 1346 | 2.69 (1.57 - 4.61)    | <0.001  | 0.68              |
| BMI <27 kg/m <sup>2</sup>          | 803  | 2.81 (1.58 - 4.98)    | <0.001  |                   |
| CAD                                | 1610 | 2.56 (1.67 - 3.94)    | <0.001  | 0.58              |
| No CAD                             | 539  | 2.74 (0.98 - 7.64)    | 0.05    |                   |
| Prior MI                           | 797  | 2.17 (1.22 - 3.86)    | 0.008   | 0.12              |
| No Prior MI                        | 1223 | 3.26 (1.83 - 5.81)    | <0.001  |                   |
| LDL-c≥ 100 mg/dL                   | 974  | 2.03 (1.18 - 3.52)    | 0.011   | 0.76              |
| LDL-c<100 mg/dL                    | 1175 | 3.23 (1.87 - 5.57)    | <0.001  |                   |
| HDL- c≥ 40 mg/dL                   | 645  | 2.02 (1.04 - 3.92)    | 0.04    | 0.75              |
| HDL-c<40 mg/dL                     | 1504 | 2.96 (1.82 - 4.80)    | <0.001  |                   |
| Triglycerides ≥ 150                | 665  | 2.86 (1.38 - 5.92)    | 0.005   | 0.41              |
| Triglycerides <150                 | 1494 | 2.82 (1.76 - 4.53)    | <0.001  |                   |

BMI, body mass index; CAD, coronary artery disease; GFR, glomerular filtration rate; HbA1C, hemoglobin A1C; HDL, high density lipoprotein; LDL, low density lipoprotein; MI, myocardial infarction. Two-sided P values are shown for the Cox model and for interaction with the groups.

N numbers for each subset are indicated.

**Table S11: Hazard ratios for 3-year MACE for erythritol in different subgroups of the European validation cohort**

| Subgroup                           | n   | Q4 vs. Q1 HR (95% CI) | P value | P for interaction |
|------------------------------------|-----|-----------------------|---------|-------------------|
| Age ≥ 70                           | 540 | 3.49 (2.12 - 5.73)    | <0.001  | 0.86              |
| Age < 70                           | 293 | 3.08 (1.22 - 7.78)    | 0.02    |                   |
| Female                             | 249 | 3.77 (1.61 - 8.80)    | 0.002   | 0.28              |
| Male                               | 584 | 4.92 (2.89 - 8.35)    | <0.001  |                   |
| Hypertension                       | 670 | 6.08 (1.31 - 28.1)    | <0.001  | 0.61              |
| No Hypertension                    | 163 | 4.97 (3.05 - 8.09)    | 0.02    |                   |
| Diabetes                           | 232 | 5.16 (2.4 - 11.1)     | <0.001  | 0.35              |
| No Diabetes                        | 601 | 2.96 (1.72 - 5.10)    | <0.001  |                   |
| HbA1C≥5.7 %                        | 439 | 5.39 (2.96 - 9.81)    | <0.001  | 0.05              |
| HbA1C<5.7 %                        | 394 | 2.13 (1.06 - 4.25)    | 0.03    |                   |
| GFR ≥ 60 ml/min/1.73m <sup>3</sup> | 559 | 2.38 (1.32 - 4.31)    | 0.004   | 0.21              |
| GFR <60 ml/min/1.73m <sup>3</sup>  | 274 | 5.25 (2.82 - 9.76)    | <0.001  |                   |
| CAD                                | 577 | 4.22 (2.58 - 6.89)    | <0.001  | 0.86              |
| No CAD                             | 256 | 5.97 (1.75 - 20.4)    | 0.004   |                   |
| Prior MI                           | 413 | 4.69 (2.54 - 8.66)    | <0.001  | 0.69              |
| No Prior MI                        | 419 | 3.48 (1.77 - 6.87)    | <0.001  |                   |
| LDL-c≥ 100 mg/dL                   | 333 | 4.27 (1.94 - 9.37)    | <0.001  | 0.98              |
| LDL-c<100 mg/dL                    | 479 | 3.92 (2.25 - 6.83)    | <0.001  |                   |
| HDL- c≥ 40 mg/dL                   | 594 | 4.28 (2.4 - 7.62)     | <0.001  | 0.99              |
| HDL-c<40 mg/dL                     | 216 | 4.15 (1.91 - 8.99)    | <0.001  |                   |
| Triglycerides ≥ 150                | 193 | 3.85 (1.50 - 9.87)    | 0.005   | 0.74              |
| Triglycerides <150                 | 388 | 3.71 (1.93 - 7.14)    | <0.001  |                   |

CAD, coronary artery disease; GFR, glomerular filtration rate; HbA1C, hemoglobin A1C; HDL, high density lipoprotein; LDL, low density lipoprotein; MI, myocardial infarction. Two-sided P values are shown for the Cox model and for interaction with the groups. N numbers for each subset are indicated.

**Table S12. Cox regression models in the discovery cohort**

|                 | HR with 95% CI     | P value |
|-----------------|--------------------|---------|
| Erythritol      | 1.31 (1.17 - 1.46) | <0.001  |
| Age             | 1.20 (0.96 - 1.49) | 0.12    |
| Gender          | 1.10 (0.70 - 1.73) | 0.68    |
| Blood pressure  | 1.04 (0.87 - 1.24) | 0.67    |
| Diabetes        | 1.16 (0.73 - 1.84) | 0.54    |
| Smoking         | 1.41 (0.82 - 2.42) | 0.22    |
| LDL cholesterol | 1.04 (0.84 - 1.28) | 0.72    |
| HDL cholesterol | 1.04 (0.81 - 1.32) | 0.77    |
| Triglycerides   | 1.11 (0.99 - 1.25) | 0.09    |
| BMI             | 0.97 (0.78 - 1.21) | 0.79    |

Hazard ratio for 3-year MACE per arbitrary unit of Erythritol (untargeted metabolomics) with covariates used for adjustment. BMI, body mass index; HDL, high density lipoprotein; LDL, low density lipoprotein. Two-sided P values are shown for the adjusted Cox model. n=1,157.

**Table S13. Cox regression analysis in US validation cohort**

|                 | HR with 95% CI     | P value |
|-----------------|--------------------|---------|
| Erythritol      | 1.21 (1.12 - 1.31) | <0.001  |
| Age             | 1.69 (1.44 - 1.98) | <0.001  |
| Gender          | 0.76 (0.56 - 1.03) | 0.08    |
| Blood pressure  | 1.00 (0.86 - 1.17) | 0.98    |
| Diabetes        | 0.82 (0.58 - 1.16) | 0.26    |
| Smoking         | 1.97 (1.35 - 2.88) | <0.001  |
| LDL cholesterol | 1.03 (0.88 - 1.19) | 0.74    |
| HDL cholesterol | 0.80 (0.68 - 0.95) | 0.01    |
| Triglycerides   | 0.89 (0.74 - 1.07) | 0.22    |
| BMI             | 0.96 (0.82 - 1.12) | 0.60    |

Hazard ratio for 3-year MACE per  $\mu\text{M}$  of erythritol with covariates used for adjustment. BMI, body mass index; HDL, high density lipoprotein; LDL, low density lipoprotein. Two-sided P values are shown for the adjusted Cox model. n=2,149.

**Table S14. Cox regression analysis in the European validation cohort**

|                 | HR with 95% CI     | P value |
|-----------------|--------------------|---------|
| Erythritol      | 1.16 (1.05 - 1.30) | 0.005   |
| Age             | 2.01 (1.6 - 2.54)  | <0.001  |
| Gender          | 1.07 (0.7 - 1.63)  | 0.76    |
| Hypertension    | 1.25 (0.73 - 2.13) | 0.41    |
| Diabetes        | 1.68 (1.14 - 2.47) | 0.009   |
| Smoking         | 1.65 (1.01 - 2.71) | 0.05    |
| LDL cholesterol | 1.09 (0.82 - 1.43) | 0.57    |
| HDL cholesterol | 0.96 (0.74 - 1.24) | 0.75    |
| Triglycerides   | 1.14 (0.95 - 1.36) | 0.16    |

Hazard ratio for 3-year MACE per  $\mu\text{M}$  of erythritol with covariates used for adjustment. HDL, high density lipoprotein; LDL, low density lipoprotein. Two-sided P values are shown for the adjusted Cox model. n=833.
